# Supplementary figures and images for: miRBoost: boosting support vector machines for microRNA precursor classification
Source: PubMed Central journal article supplement — RNA. 2015 May;21(5):775–85. doi: 10.1261/rna.043612.113 (PMC4408786; doi:10.1261/rna.043612.113), 2015-05

**human**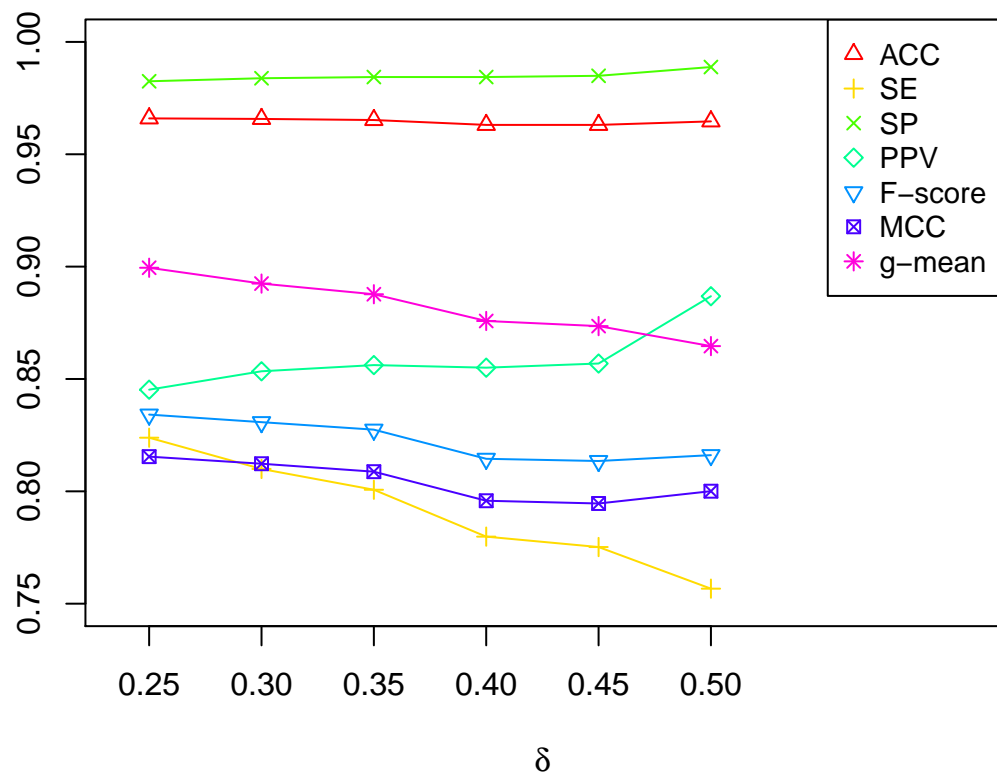**cross-species**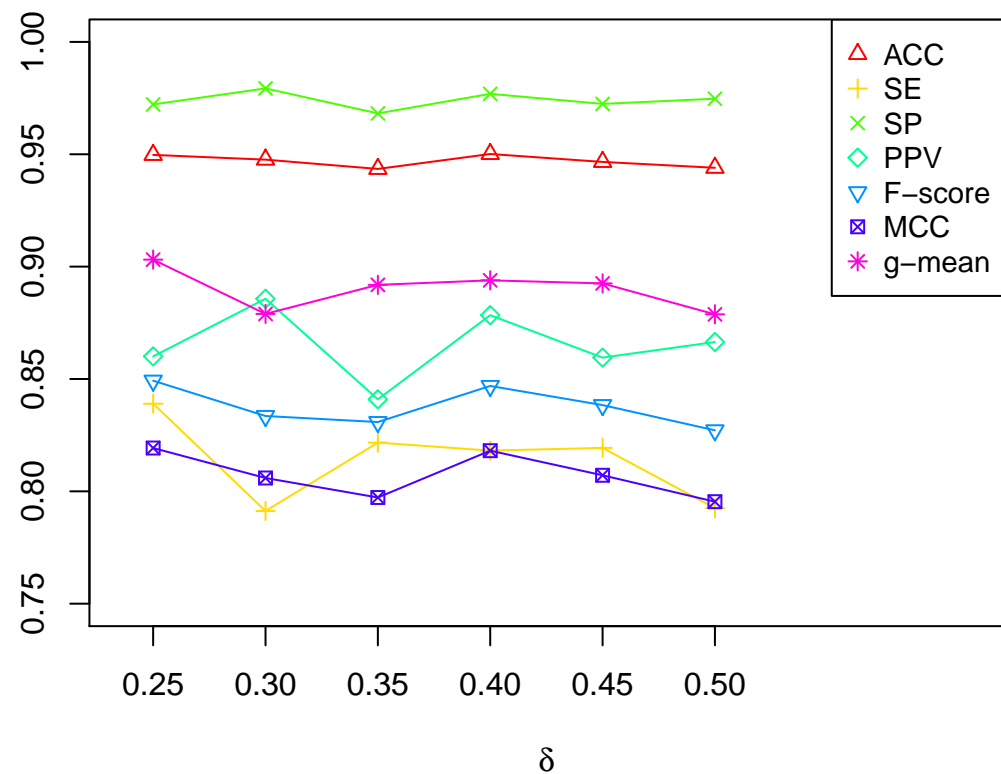

Supplement: supp_043612.113_SupFig1.pdf [file supp_043612.113_SupFig1.pdf]
